# Supplementary material for: Rapid modification of the bone microenvironment following short-term treatment with Cabozantinib in vivo
Source: PubMed Central journal article supplement (PMC4768060; doi:10.1016/j.bone.2015.08.003), 2015-12

# 5-day Treatment

17-week old female GFP Ob<sup>+</sup> mice

8-9-week old female GFP Ob<sup>+</sup> mice

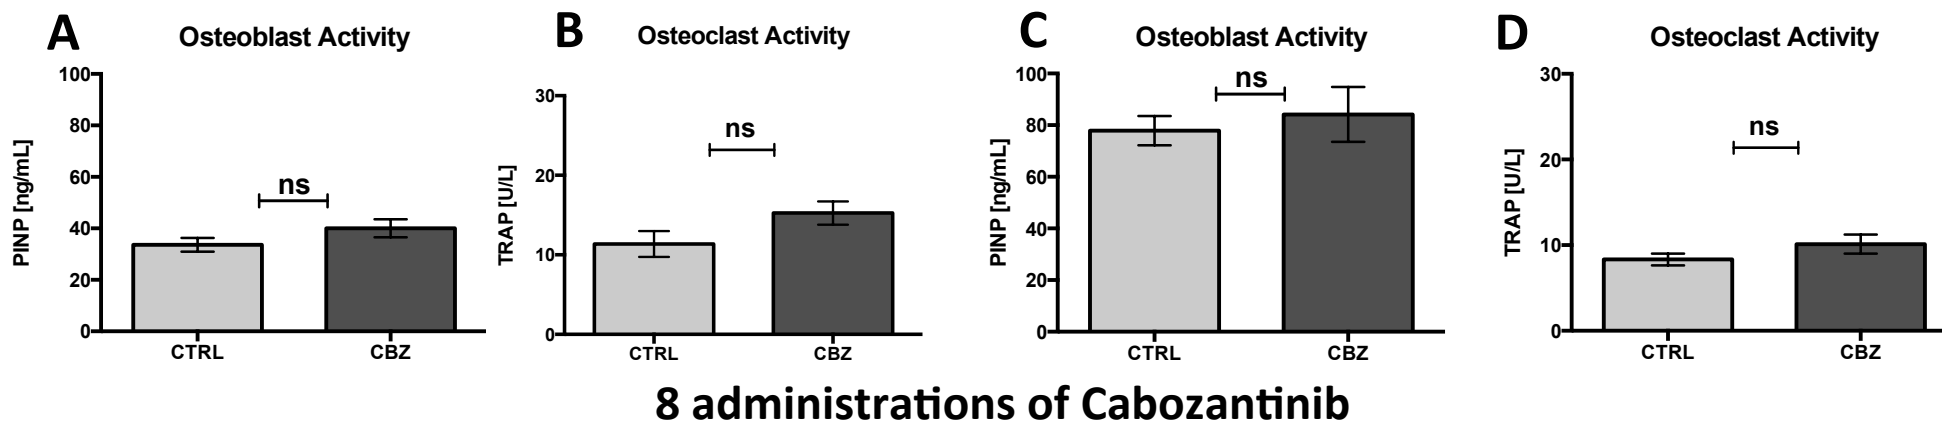

6-week old male BALB/c nude

6-week old female BALB/c nude

9-week old female GFP Ob<sup>+</sup> mice

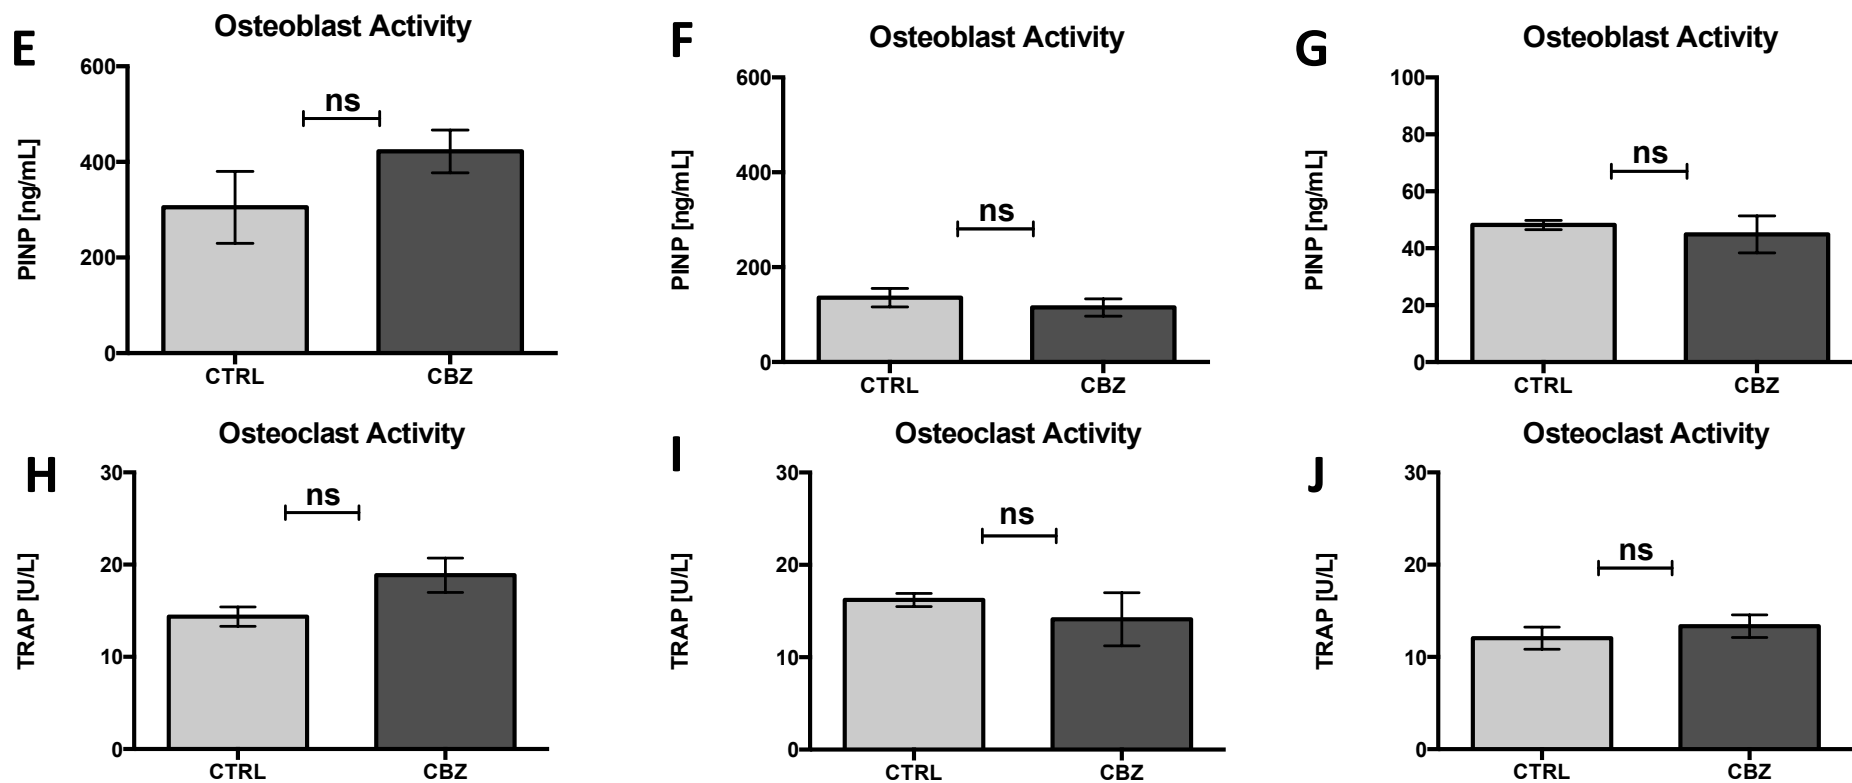

Supplement: mmc1.pdf [file mmc1.pdf]
