# Supplementary material for: Rapid modification of the bone microenvironment following short-term treatment with Cabozantinib in vivo
Source: PubMed Central journal article supplement (PMC4768060; doi:10.1016/j.bone.2015.08.003), 2015-12

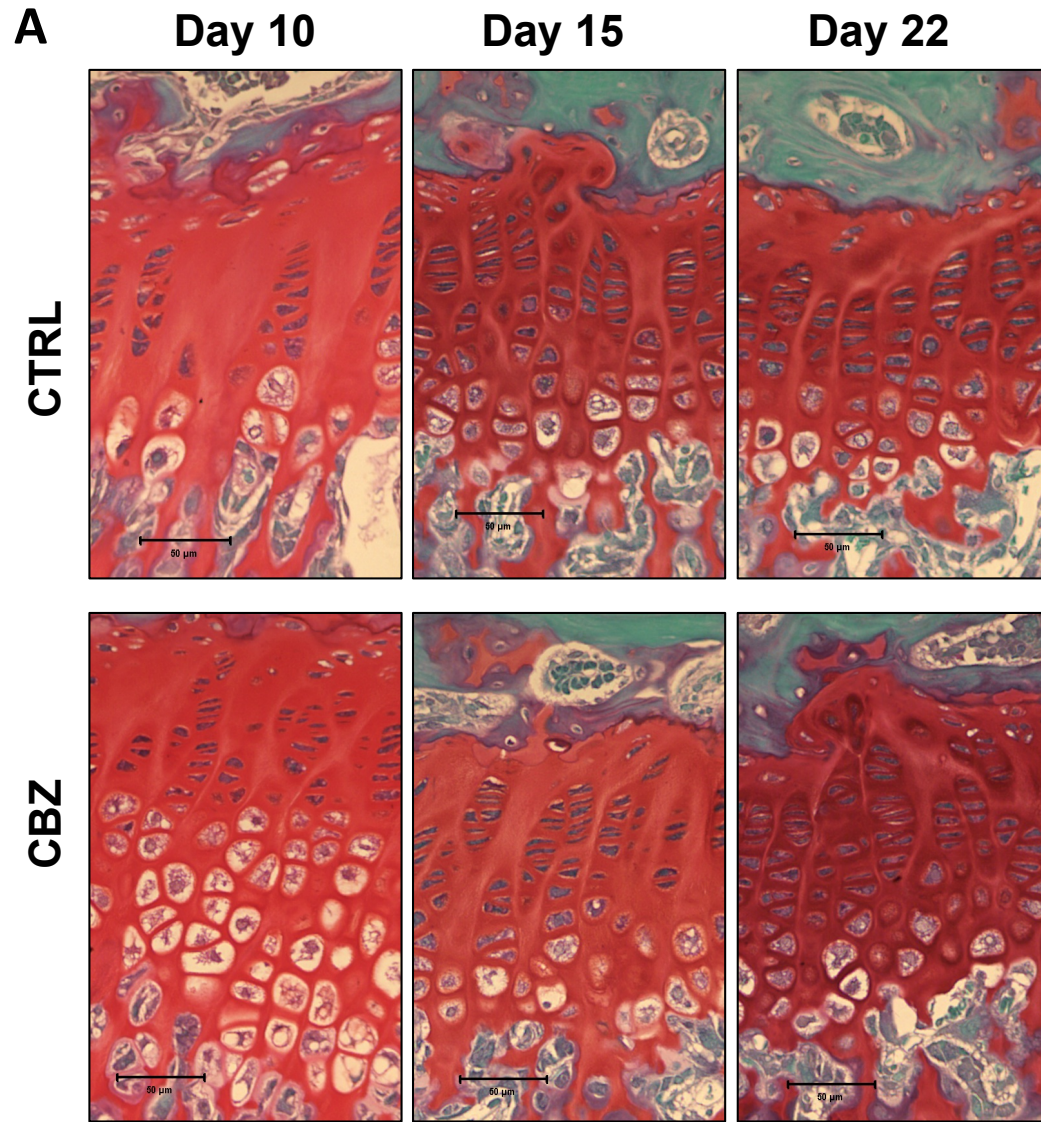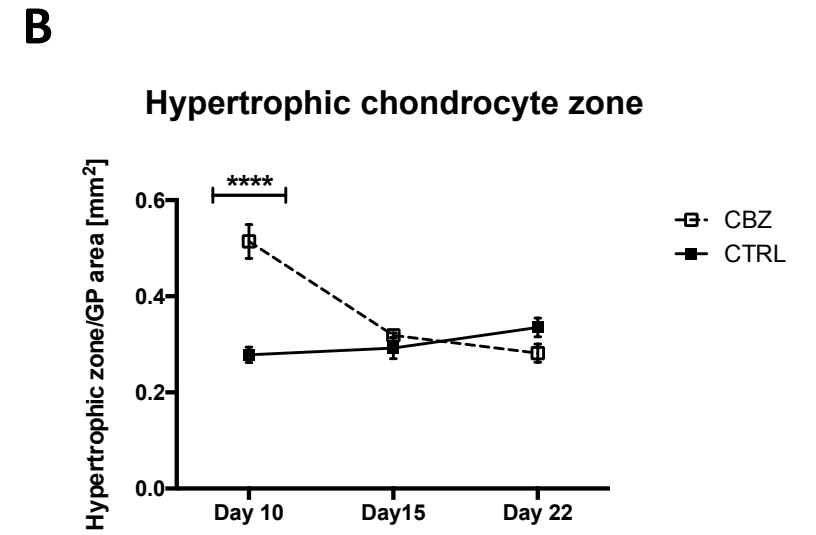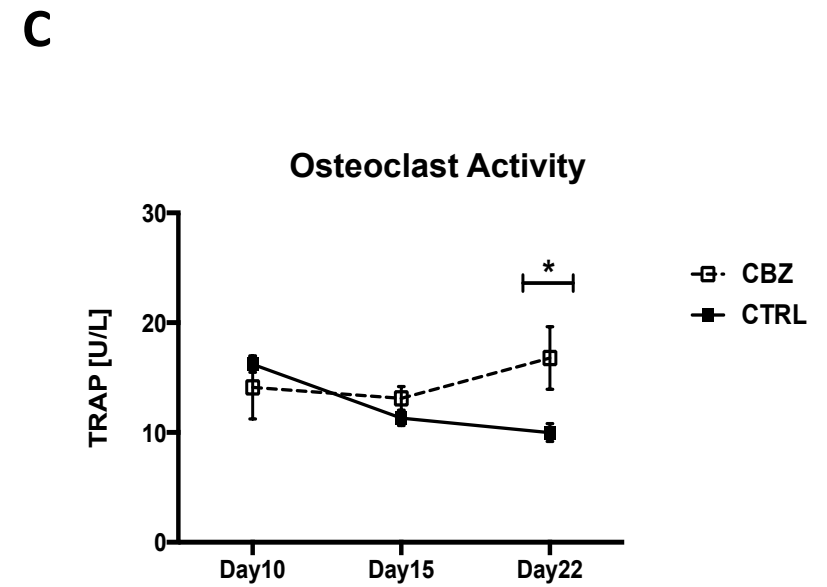

Supplement: mmc2.pdf [file mmc2.pdf]
